# Supplementary material
Source: MDPI journal article supplement (https://www.mdpi.com/2312-7481/8/11/153)
Supplement: s1 [file s1]

# Mononuclear heptacoordinated 3d-metal helicates as a new family of single ion magnets

Yulia P. Tupolova <sup>1</sup>, Denis V. Korchagin <sup>2</sup>, Anastasya S. Andreeva <sup>1</sup>, Valery V. Tkachev <sup>2</sup>, Gennadii V. Shilov <sup>2</sup>, Vladimir A. Lazarenko <sup>3</sup>, Leonid D. Popov <sup>1</sup>, Konstantin A. Babeshkin <sup>4</sup>, Nikolay N. Efimov <sup>4</sup>, Roman B. Morgunov <sup>2</sup>, Andrei V. Palii <sup>2</sup>, Stanislav P. Kubrin <sup>1</sup>, Igor N. Shcherbakov<sup>1,\*</sup>, Sergey M. Aldoshin <sup>2</sup>

<sup>1</sup> Department of Chemistry, Southern Federal University, 7, Zorge Str., Rostov-on-Don, 344090, Russia;

<sup>2</sup> Federal Research Center of Problems of Chemical Physics and Medicine Chemistry, 1, Acad. Semenov Av., Chernogolovka, Moscow Region, 142432, Russia;

<sup>3</sup> National Research Center "Kurchatov Institute", Acad. Kurchatov Sq., 1, Moscow 123182, Russia;

<sup>4</sup> N. S. Kurnakov Institute of General and Inorganic Chemistry, Russian Academy of Sciences, 31, Leninsky prosp., 119991 Moscow, Russia.

\* Correspondence: shcherbakov@sfedu.ru

## Supplementary Information

### Computational details

Theoretical calculations of the electronic structure for complexes 1-4 were performed using post-Hartree–Fock multi-reference wave function (WF) approach based on state-averaged complete active space self-consistent field calculations (SA-CASSCF) [1-4], followed by N-electron valence second-order perturbation theory (NEVPT2) [4-7]. Scalar relativistic effects were accounted for while using a standard second-order Douglas–Kroll–Hess (DKH) procedure [8]. For calculations, the segmented all-electron relativistically contracted version [9] of Ahlrichs polarized triple- $\zeta$  basis set, def2-TZVP [10-12], was used for all atoms. To improve the calculation time, the resolution of the identity approximation with corresponding correlation fitting of the basis set [13] was employed. Spin–orbit effects were included using the quasi-degenerate perturbation theory (QDPT) [14].

The CASSCF(n, 5) active space was constructed from 5 MOs with predominant contributions of 3d-AOs from the metal center and the number of electrons, corresponding to a metal ion electronic configuration (n = 6 for Fe(II), 7 for Co(II) and 8 for Ni(II) compounds). All possible multiplet states arising from the corresponding d<sup>n</sup> configuration were included in the WF expansion in all cases.

Nuclei coordinates of non-hydrogen atoms were taken from diffraction experimental data, positions of hydrogen atoms were optimized employing density functional theory with the BP86 functional and Ahlrichs polarized basis set def2-TZVP [10-12] (optimized nuclei coordinates are listed in Table S4, in the current Supplementary Materials file).

### References

1. Roos, B.O.; Taylor, P.R.; Siegbahn, P.E.M. A complete active space SCF method (CASSCF) using a density matrix formulated super-CI approach. *Chem. Phys.* **1980**, *48*, 157-173, doi:https://doi.org/10.1016/0301-0104(80)80045-0.
2. Per, S.; Anders, H.; Björn, R.; Bernard, L. A Comparison of the Super-CI and the Newton-Raphson Scheme in the Complete Active Space SCF Method. *Phys. Scr.* **1980**, *21*, 323.
3. Siegbahn, P.E.M.; Almlöf, J.; Heiberg, A.; Roos, B.O. The complete active space SCF (CASSCF) method in a Newton–Raphson formulation with application to the HNO molecule. *J. Chem. Phys.* **1981**, *74*, 2384-2396, doi:10.1063/1.441359.
4. Angeli, C.; Cimiraglia, R.; Evangelisti, S.; Leininger, T.; Malrieu, J.P. Introduction of n-electron valence states for multireference perturbation theory. *J. Chem. Phys.* **2001**, *114*, 10252-10264, doi:10.1063/1.1361246.

5. Angeli, C.; Cimiraglia, R.; Malrieu, J.-P. N-electron valence state perturbation theory: a fast implementation of the strongly contracted variant. *Chem. Phys. Lett.* **2001**, *350*, 297-305, doi:https://doi.org/10.1016/S0009-2614(01)01303-3.
6. Angeli, C.; Cimiraglia, R. Multireference perturbation configuration interaction V. Third-order energy contributions in the Møller–Plesset and Epstein–Nesbet partitions. *Theor. Chem. Acc.* **2002**, *107*, 313-317, doi:10.1007/s00214-002-0336-z.
7. Angeli, C.; Cimiraglia, R.; Malrieu, J.-P. n-electron valence state perturbation theory: A spinless formulation and an efficient implementation of the strongly contracted and of the partially contracted variants. *J. Chem. Phys.* **2002**, *117*, 9138-9153, doi:10.1063/1.1515317.
8. Hess, B.A. Relativistic electronic-structure calculations employing a two-component no-pair formalism with external-field projection operators. *Phys. Rev. A* **1986**, *33*, 3742-3748, doi:10.1103/PhysRevA.33.3742.
9. Pantazis, D.A.; Chen, X.Y.; Landis, C.R.; Neese, F. All-electron scalar relativistic basis sets for third-row transition metal atoms. *J. Chem. Theory Comput.* **2008**, *4*, 908.
10. Schafer, A.; Huber, C.; Ahlrichs, R. Fully optimized contracted Gaussian basis sets of triple zeta valence quality for atoms Li to Kr. *J. Chem. Phys.* **1994**, *100*, 5829-5835, doi:10.1063/1.467146.
11. Schafer, A.; Horn, H.; Ahlrichs, R. Fully optimized contracted Gaussian basis sets for atoms Li to Kr. *J. Chem. Phys.* **1992**, *97*, 2571-2577, doi:10.1063/1.463096.
12. Weigend, F.; Ahlrichs, R. Balanced basis sets of split valence, triple zeta valence and quadruple zeta valence quality for H to Rn: Design and assessment of accuracy. *Physical Chemistry Chemical Physics* **2005**, *7*, 3297-3305, doi:10.1039/B508541A.
13. Neese, F. An improvement of the resolution of the identity approximation for the formation of the Coulomb matrix. *J. Comput. Chem.* **2003**, *24*, 1740-1747, doi:doi:10.1002/jcc.10318.
14. Ganyushin, D.; Neese, F. First-principles calculations of zero-field splitting parameters. *J. Chem. Phys.* **2006**, *125*, 024103, doi:10.1063/1.2213976.

**Table S1.** Deviations from ideal structure, calculated with SHAPE program for several selected types of coordination polyhedral\* with seven (**1-3**) and six (**4**) coordination number. (Zero value corresponds to ideal structure of the selected type).

| Compound 1 |        | Compound 2 |        | Compound 2a<br>([MLA <sub>2</sub> ] unit) |        | Compound 3 |         | Compound 4 |        |
|------------|--------|------------|--------|-------------------------------------------|--------|------------|---------|------------|--------|
| PBPY-7     | CTPR-7 | PBPY-7     | CTPR-7 | PBPY-7                                    | CTPR-7 | PBPY-7     | JPBPY-7 | OC-6       | PPY-6  |
| 2.389      | 4.845  | 3.424      | 1.640  | 2.765                                     | 2.275  | 2.793      | 4.525   | 4.714      | 17.942 |

\* Polyhedra selected:

PBPY-7      3 D5h    Pentagonal bipyramid  
CTPR-7      5 C2v    Capped trigonal prism  
JPBPY-7     6 D5h    Johnson pentagonal bipyramid (J13)  
OC-6        3 Oh    Octahedron  
PPY-6        2 C5v    Pentagonal pyramid

**Table S2** Selected structural parameters for **1-4**. For each compound molecular structure with numbering scheme is shown for convenience.

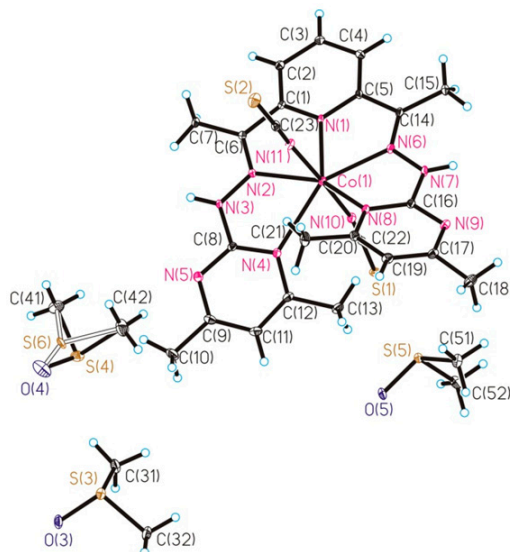

### Compound 1

| Compound 1       |            |             |            |             |            |
|------------------|------------|-------------|------------|-------------|------------|
| Parameter        | Value      | Parameter   | Value      | Parameter   | Value      |
| Bond lengths, Å  |            |             |            |             |            |
| Co1-N1           | 2.178(4)   | Co1- N3     | 2.270(4)   | Co1-N4      | 2.096(4)   |
| Co1- N5          | 2.335(4)   | Co1-N6      | 2.087(4)   | Co1-N11     | 2.495(4)   |
| Co1-N12          | 2.216(4)   | S1-C13      | 1.631(5)   | N1-C16      | 1.341(6)   |
| N1-C18           | 1.347(6)   | N2-C20      | 1.378(6)   | N2-N3       | 1.350(5)   |
| N3-C22           | 1.294(6)   | N4-C4       | 1.162(6)   | N5-C21      | 1.349(7)   |
| N6-C13           | 1.164(6)   | N8-C21      | 1.330(6)   | N9-C20      | 1.328(6)   |
| N10-N12          | 1.354(5)   | N10-C21     | 1.376(6)   | N11-C20     | 1.346(6)   |
| N12-C14          | 1.286(6)   | N2-H2       | 0.8600     | N10-H10     | 0.8600     |
| C14-C16          | 1.474(6)   | C16-C19     | 1.391(6)   | C18-C22     | 1.470(6)   |
| C22-C23          | 1.499(7)   |             |            |             |            |
| Bond angles, deg |            |             |            |             |            |
| N1-Co1-N3        | 70.41(14)  | N1-Co1-N4   | 91.33(14)  | N1-Co1-N5   | 136.66(14) |
| N1-Co1-N6        | 88.31(14)  | N1-Co1-N11  | 134.31(12) | N1-Co1-N12  | 70.54(14)  |
| N3-Co1-N4        | 95.68(14)  | N3-Co1-N5   | 148.15(13) | N3-Co1-N6   | 81.76(14)  |
| N3-Co1-N11       | 66.95(13)  | N3-Co1-N12  | 140.79(13) | N4-Co1-N5   | 99.23(13)  |
| N4-Co1-N6        | 177.39(14) | N4-Co1-N11  | 77.48(14)  | N4-Co1-N12  | 81.84(14)  |
| N5-Co1-N6        | 82.79(13)  | N5-Co1-N11  | 89.02(12)  | N5-Co1-N12  | 69.61(13)  |
| N6-Co1-N11       | 100.96(14) | N6-Co1-N12  | 100.46(14) | N11-Co1-N12 | 147.37(14) |
| C16-N1-C18       | 119.5(4)   | Co1-N1-C16  | 119.9(3)   | Co1-N1-C18  | 120.6(3)   |
| N3-N2-C20        | 117.7(4)   | Co1-N3-N2   | 120.0(3)   | Co1-N3-C22  | 119.2(3)   |
| N2-N3-C22        | 119.8(4)   | Co1-N4-C4   | 170.5(4)   | Co1-N5-C21  | 112.9(3)   |
| Co1-N6-C13       | 172.5(4)   | N12-N10-C21 | 116.9(4)   | Co1-N11-C20 | 113.3(3)   |
| Co1-N12-N10      | 117.0(3)   | Co1-N12-C14 | 121.7(3)   | N10-N12-C14 | 120.9(4)   |
| N3-N2-H2         | 121.00     | C20-N2-H2   | 121.00     | N12-N10-H10 | 122.00     |
| C21-N10-H10      | 122.00     | S1-C13-N6   | 178.7(5)   | N12-C14-C16 | 113.1(4)   |
| N1-C16-C19       | 122.1(4)   | N1-C16-C14  | 114.7(4)   | C14-C16-C19 | 123.3(4)   |
| N1-C18-C22       | 114.6(4)   | N9-C20-N11  | 128.4(4)   | N2-C20-N9   | 113.9(4)   |
| N2-C20-N11       | 117.7(4)   | N5-C21-N8   | 128.1(4)   | N5-C21-N10  | 116.9(4)   |

|                     |           |                 |           |                 |           |
|---------------------|-----------|-----------------|-----------|-----------------|-----------|
| N8-C21-N10          | 114.9(4)  | N3-C22-C18      | 114.2(4)  | C18-C22-C23     | 120.9(4)  |
| N3-C22-C23          | 124.9(4)  |                 |           |                 |           |
| Torsion angles, deg |           |                 |           |                 |           |
| N3-Co1-N1-C16       | -174.6(4) | N3-Co1-N1-C18   | 5.4(3)    | N4-Co1-N1-C16   | -79.0(3)  |
| N4-Co1-N1-C18       | 101.0(3)  | N5-Co1-N1-C16   | 26.0(4)   | N5-Co1-N1-C18   | -154.1(3) |
| N6-Co1-N1-C16       | 103.6(3)  | N6-Co1-N1-C18   | -76.5(3)  | N11-Co1-N1-C16  | -152.7(3) |
| N11-Co1-N1-C18      | 27.2(4)   | N12-Co1-N1-C16  | 1.9(3)    | N12-Co1-N1-C18  | -178.2(4) |
| N1-Co1-N3-N2        | -178.1(3) | N1-Co1-N3-C22   | -9.3(3)   | N4-Co1-N3-N2    | 92.5(3)   |
| N4-Co1-N3-C22       | -98.7(3)  | N5-Co1-N3-N2    | -25.2(5)  | N5-Co1-N3-C22   | 143.6(3)  |
| N6-Co1-N3-N2        | -86.9(3)  | N6-Co1-N3-C22   | 81.9(3)   | N11-Co1-N3-N2   | 18.8(3)   |
| N11-Co1-N3-C22      | -172.4(4) | N12-Co1-N3-N2   | 176.6(3)  | N12-Co1-N3-C22  | -14.6(4)  |
| N1-Co1-N5-C21       | -45.6(4)  | N3-Co1-N5-C21   | 173.2(3)  | N4-Co1-N5-C21   | 56.4(3)   |
| N6-Co1-N5-C21       | -125.3(3) | N11-Co1-N5-C21  | 133.5(3)  | N12-Co1-N5-C21  | -21.3(3)  |
| N1-Co1-N11-C20      | -36.5(4)  | N3-Co1-N11-C20  | -14.1(3)  | N4-Co1-N11-C20  | -115.9(3) |
| N5-Co1-N11-C20      | 144.4(3)  | N6-Co1-N11-C20  | 62.0(3)   | N12-Co1-N11-C20 | -167.9(3) |
| N1-Co1-N12-N10      | -176.1(3) | N1-Co1-N12-C14  | -3.6(3)   | N3-Co1-N12-N10  | -170.7(2) |
| N3-Co1-N12-C14      | 1.7(5)    | N4-Co1-N12-N10  | -81.7(3)  | N4-Co1-N12-C14  | 90.7(3)   |
| N5-Co1-N12-N10      | 21.3(3)   | N5-Co1-N12-C14  | -166.2(4) | N6-Co1-N12-N10  | 99.5(3)   |
| N6-Co1-N12-C14      | -88.0(3)  | N11-Co1-N12-N10 | -30.8(4)  | N11-Co1-N12-C14 | 141.7(3)  |
| Co1-N1-C16-C14      | -0.4(5)   | Co1-N1-C16-C19  | 178.8(3)  | C18-N1-C16-C14  | 179.7(4)  |
| C18-N1-C16-C19      | -1.2(6)   | Co1-N1-C18-C22  | -1.8(5)   | C16-N1-C18-C22  | 178.2(4)  |
| C20-N2-N3-Co1       | -22.1(5)  | C20-N2-N3-C22   | 169.2(4)  | N3-N2-C20-N9    | -172.4(4) |
| N3-N2-C20-N11       | 7.1(6)    | Co1-N3-C22-C18  | 11.4(5)   | Co1-N3-C22-C23  | -169.3(3) |
| N2-N3-C22-C18       | -179.8(4) | N2-N3-C22-C23   | -0.5(7)   | Co1-N5-C21-N8   | -162.5(4) |
| Co1-N5-C21-N10      | 19.6(5)   | C21-N10-N12-Co1 | -19.5(5)  | C21-N10-N12-C14 | 168.0(4)  |
| N12-N10-C21-N5      | -1.3(6)   | N12-N10-C21-N8  | -179.4(4) | Co1-N11-C20-N2  | 9.0(5)    |
| Co1-N11-C20-N9      | -171.6(4) | Co1-N12-C14-C16 | 4.5(5)    | N10-N12-C14-C16 | 176.7(4)  |
| N12-C14-C16-N1      | -2.6(6)   | N12-C14-C16-C19 | 178.3(4)  | N1-C18-C22-N3   | -6.3(6)   |
| N1-C18-C22-C23      | 174.3(4)  |                 |           |                 |           |

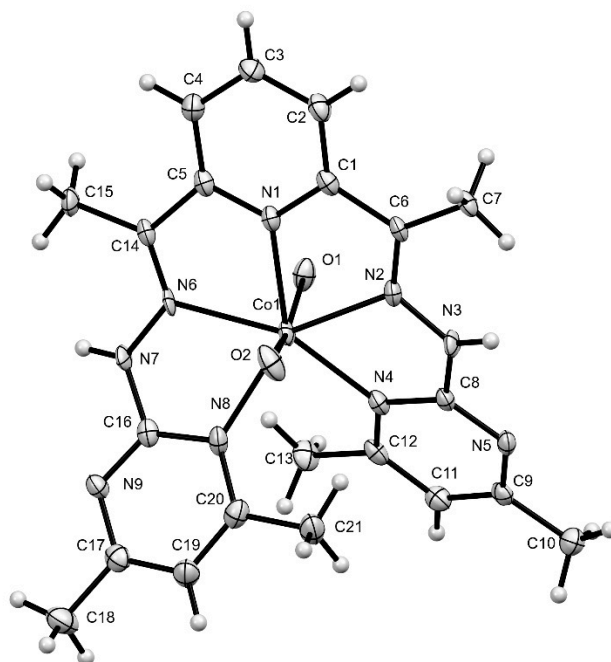

**Compound 2**

| Parameter           | Value      | Parameter    | Value      | Parameter    | Value      |
|---------------------|------------|--------------|------------|--------------|------------|
| Bond lengths, Å     |            |              |            |              |            |
| Co1-O1              | 2.223(3)   | Co1-O2       | 2.214(3)   | Co1-N1       | 2.140(4)   |
| Co1-N2              | 2.141(3)   | Co1-N4       | 2.222(3)   | Co1-N6       | 2.155(3)   |
| Co1-N8              | 2.240(4)   | Cl2-O8       | 1.426(4)   | Cl2-O9       | 1.374(10)  |
| Cl2-O10             | 1.547(9)   | N1-C5        | 1.352(5)   | N1-C1        | 1.337(5)   |
| N2-C6               | 1.293(5)   | N2-N3        | 1.363(5)   | N3-C8        | 1.383(5)   |
| N4-C12              | 1.360(5)   | N4-C8        | 1.341(5)   | N5-C8        | 1.328(5)   |
| N5-C9               | 1.344(5)   | N6-N7        | 1.367(4)   | N6-C14       | 1.286(6)   |
| N7-C16              | 1.403(6)   | N8-C20       | 1.363(6)   | N8-C16       | 1.340(5)   |
| N9-C16              | 1.326(5)   | N9-C17       | 1.345(6)   | C1-C6        | 1.485(6)   |
| C1-C2               | 1.395(6)   | C2-C3        | 1.389(6)   | C3-C4        | 1.396(5)   |
| C4-C5               | 1.387(6)   | C5-C14       | 1.489(5)   | C6-C7        | 1.485(5)   |
| C9-C10              | 1.500(6)   | C9-C11       | 1.381(5)   | C11-C12      | 1.383(6)   |
| C12-C13             | 1.491(5)   | C14-C15      | 1.488(6)   | C17-C19      | 1.387(6)   |
| C17-C18             | 1.492(6)   | C19-C20      | 1.379(7)   | C20-C21      | 1.505(7)   |
| Bond angles, deg    |            |              |            |              |            |
| O1-Co1-O2           | 166.29(13) | O1-Co1-N1    | 82.89(12)  | O1-Co1-N2    | 93.10(11)  |
| O1-Co1-N4           | 77.67(12)  | O1-Co1-N6    | 82.65(12)  | O1-Co1-N8    | 115.05(11) |
| O2-Co1-N1           | 83.72(13)  | O2-Co1-N2    | 79.89(11)  | O2-Co1-N4    | 110.89(14) |
| O2-Co1-N6           | 96.00(12)  | O2-Co1-N8    | 77.17(11)  | N1-Co1-N2    | 71.58(13)  |
| N1-Co1-N4           | 137.90(12) | N1-Co1-N6    | 72.16(13)  | N1-Co1-N8    | 137.43(12) |
| N2-Co1-N4           | 72.60(12)  | N2-Co1-N6    | 143.74(14) | N2-Co1-N8    | 139.14(14) |
| N4-Co1-N6           | 139.80(11) | N4-Co1-N8    | 84.65(12)  | N6-Co1-N8    | 72.47(13)  |
| C1-N1-C5            | 121.3(4)   | Co1-N1-C1    | 119.8(3)   | Co1-N1-C5    | 118.8(2)   |
| N3-N2-C6            | 122.1(3)   | Co1-N2-C6    | 122.4(3)   | Co1-N2-N3    | 115.2(2)   |
| N2-N3-C8            | 116.0(3)   | C8-N4-C12    | 115.6(3)   | Co1-N4-C8    | 113.9(2)   |
| Co1-N4-C12          | 130.2(3)   | C8-N5-C9     | 115.7(3)   | Co1-N6-C14   | 121.6(2)   |
| N7-N6-C14           | 122.5(3)   | Co1-N6-N7    | 115.7(3)   | N6-N7-C16    | 115.4(3)   |
| Co1-N8-C16          | 114.7(3)   | Co1-N8-C20   | 130.8(3)   | C16-N8-C20   | 114.4(4)   |
| C16-N9-C17          | 115.5(3)   | N1-C1-C6     | 113.6(4)   | C2-C1-C6     | 125.4(3)   |
| N1-C1-C2            | 121.0(4)   | C1-C2-C3     | 118.4(3)   | C2-C3-C4     | 120.2(4)   |
| C3-C4-C5            | 118.5(4)   | N1-C5-C14    | 113.8(4)   | C4-C5-C14    | 125.5(4)   |
| N1-C5-C4            | 120.6(3)   | N2-C6-C7     | 124.8(4)   | C1-C6-C7     | 123.4(3)   |
| N2-C6-C1            | 111.8(3)   | N3-C8-N5     | 115.5(3)   | N3-C8-N4     | 116.6(4)   |
| N4-C8-N5            | 127.9(3)   | N5-C9-C10    | 116.3(3)   | N5-C9-C11    | 121.1(4)   |
| C10-C9-C11          | 122.6(3)   | C9-C11-C12   | 119.4(3)   | N4-C12-C13   | 118.8(4)   |
| C11-C12-C13         | 121.2(3)   | N4-C12-C11   | 120.1(3)   | C5-C14-C15   | 120.9(4)   |
| N6-C14-C15          | 126.5(3)   | N6-C14-C5    | 112.6(3)   | N7-C16-N9    | 114.7(3)   |
| N7-C16-N8           | 116.5(3)   | N8-C16-N9    | 128.8(4)   | N9-C17-C19   | 121.1(4)   |
| N9-C17-C18          | 117.7(4)   | C18-C17-C19  | 121.2(4)   | C17-C19-C20  | 118.7(4)   |
| N8-C20-C21          | 119.1(4)   | C19-C20-C21  | 119.8(4)   | N8-C20-C19   | 121.1(4)   |
| Torsion angles, deg |            |              |            |              |            |
| O1-Co1-N1-C1        | -100.4(3)  | O1-Co1-N1-C5 | 77.0(3)    | O2-Co1-N1-C1 | 76.7(3)    |
| O2-Co1-N1-C5        | -105.9(3)  | N2-Co1-N1-C1 | -4.7(3)    | N2-Co1-N1-C5 | 172.7(3)   |
| N4-Co1-N1-C1        | -37.7(3)   | N4-Co1-N1-C5 | 139.7(2)   | N6-Co1-N1-C1 | 175.1(3)   |

|                 |           |                 |           |                |           |
|-----------------|-----------|-----------------|-----------|----------------|-----------|
| N6-Co1-N1-C5    | -7.5(2)   | N8-Co1-N1-C1    | 140.0(3)  | N8-Co1-N1-C5   | -42.6(3)  |
| O1-Co1-N2-N3    | -97.3(2)  | O1-Co1-N2-C6    | 89.8(3)   | O2-Co1-N2-N3   | 94.6(3)   |
| O2-Co1-N2-C6    | -78.4(3)  | N1-Co1-N2-N3    | -178.8(3) | N1-Co1-N2-C6   | 8.3(3)    |
| N4-Co1-N2-N3    | -21.3(2)  | N4-Co1-N2-C6    | 165.8(3)  | N6-Co1-N2-N3   | -179.1(2) |
| N6-Co1-N2-C6    | 8.0(4)    | N8-Co1-N2-N3    | 38.0(3)   | N8-Co1-N2-C6   | -135.0(3) |
| O1-Co1-N4-C8    | 115.0(3)  | O1-Co1-N4-C12   | -71.5(3)  | O2-Co1-N4-C8   | -53.9(3)  |
| O2-Co1-N4-C12   | 119.7(3)  | N1-Co1-N4-C8    | 50.5(4)   | N1-Co1-N4-C12  | -136.0(3) |
| N2-Co1-N4-C8    | 17.7(3)   | N2-Co1-N4-C12   | -168.8(4) | N6-Co1-N4-C8   | 177.5(3)  |
| N6-Co1-N4-C12   | -9.0(5)   | N8-Co1-N4-C8    | -127.9(3) | N8-Co1-N4-C12  | 45.6(4)   |
| O1-Co1-N6-N7    | 99.0(2)   | O1-Co1-N6-C14   | -75.1(3)  | O2-Co1-N6-N7   | -94.7(2)  |
| O2-Co1-N6-C14   | 91.2(3)   | N1-Co1-N6-N7    | -176.2(3) | N1-Co1-N6-C14  | 9.8(3)    |
| N2-Co1-N6-N7    | -175.8(2) | N2-Co1-N6-C14   | 10.1(4)   | N4-Co1-N6-N7   | 38.1(3)   |
| N4-Co1-N6-C14   | -136.0(3) | N8-Co1-N6-N7    | -20.3(2)  | N8-Co1-N6-C14  | 165.7(3)  |
| O1-Co1-N8-C16   | -58.6(3)  | O1-Co1-N8-C20   | 120.9(3)  | O2-Co1-N8-C16  | 114.8(3)  |
| O2-Co1-N8-C20   | -65.7(3)  | N1-Co1-N8-C16   | 49.2(3)   | N1-Co1-N8-C20  | -131.3(3) |
| N2-Co1-N8-C16   | 172.2(2)  | N2-Co1-N8-C20   | -8.3(4)   | N4-Co1-N8-C16  | -132.4(3) |
| N4-Co1-N8-C20   | 47.2(3)   | N6-Co1-N8-C16   | 14.2(2)   | N6-Co1-N8-C20  | -166.3(3) |
| Co1-N1-C1-C2    | 178.9(3)  | Co1-N1-C1-C6    | 1.5(4)    | C5-N1-C1-C2    | 1.6(5)    |
| C5-N1-C1-C6     | -175.9(3) | Co1-N1-C5-C4    | -176.8(3) | Co1-N1-C5-C14  | 5.2(4)    |
| C1-N1-C5-C4     | 0.6(5)    | C1-N1-C5-C14    | -177.4(3) | Co1-N2-N3-C8   | 22.9(4)   |
| C6-N2-N3-C8     | -164.2(3) | Co1-N2-C6-C1    | -9.9(4)   | Co1-N2-C6-C7   | 170.9(3)  |
| N3-N2-C6-C1     | 177.6(3)  | N3-N2-C6-C7     | -1.6(5)   | N2-N3-C8-N4    | -6.6(5)   |
| N2-N3-C8-N5     | 172.8(3)  | Co1-N4-C8-N3    | -12.1(4)  | Co1-N4-C8-N5   | 168.7(3)  |
| C12-N4-C8-N3    | 173.4(3)  | C12-N4-C8-N5    | -5.8(6)   | Co1-N4-C12-C11 | -169.7(3) |
| Co1-N4-C12-C13  | 10.2(5)   | C8-N4-C12-C11   | 3.7(5)    | C8-N4-C12-C13  | -176.4(3) |
| C9-N5-C8-N3     | -175.8(3) | C9-N5-C8-N4     | 3.4(6)    | C8-N5-C9-C10   | 178.2(3)  |
| C8-N5-C9-C11    | 1.0(5)    | Co1-N6-N7-C16   | 24.3(3)   | C14-N6-N7-C16  | -161.7(3) |
| Co1-N6-C14-C5   | -9.9(4)   | Co1-N6-C14-C15  | 170.8(3)  | N7-N6-C14-C5   | 176.4(3)  |
| N7-N6-C14-C15   | -2.9(5)   | N6-N7-C16-N8    | -11.2(4)  | N6-N7-C16-N9   | 169.6(3)  |
| Co1-N8-C16-N7   | -6.5(4)   | Co1-N8-C16-N9   | 172.6(3)  | C20-N8-C16-N7  | 173.9(3)  |
| C20-N8-C16-N9   | -7.0(5)   | Co1-N8-C20-C19  | -176.6(2) | Co1-N8-C20-C21 | 4.5(5)    |
| C16-N8-C20-C19  | 2.9(5)    | C16-N8-C20-C21  | -176.0(3) | C17-N9-C16-N7  | -175.5(3) |
| C17-N9-C16-N8   | 5.5(5)    | C16-N9-C17-C18  | 179.1(3)  | C16-N9-C17-C19 | 0.3(5)    |
| N1-C1-C2-C3     | -2.5(5)   | C6-C1-C2-C3     | 174.6(3)  | N1-C1-C6-N2    | 5.2(4)    |
| N1-C1-C6-C7     | -175.7(3) | C2-C1-C6-N2     | -172.1(3) | C2-C1-C6-C7    | 7.1(6)    |
| C1-C2-C3-C4     | 1.4(5)    | C2-C3-C4-C5     | 0.6(5)    | C3-C4-C5-N1    | -1.6(5)   |
| C3-C4-C5-C14    | 176.1(3)  | N1-C5-C14-N6    | 2.9(4)    | N1-C5-C14-C15  | -177.8(3) |
| C4-C5-C14-N6    | -175.0(3) | C4-C5-C14-C15   | 4.3(5)    | N5-C9-C11-C12  | -2.6(6)   |
| C10-C9-C11-C12  | -179.6(4) | C9-C11-C12-N4   | 0.1(6)    | C9-C11-C12-C13 | -179.8(4) |
| N9-C17-C19-C20  | -3.6(5)   | C18-C17-C19-C20 | 177.7(3)  | C17-C19-C20-N8 | 1.8(5)    |
| C17-C19-C20-C21 | -179.2(3) |                 |           |                |           |

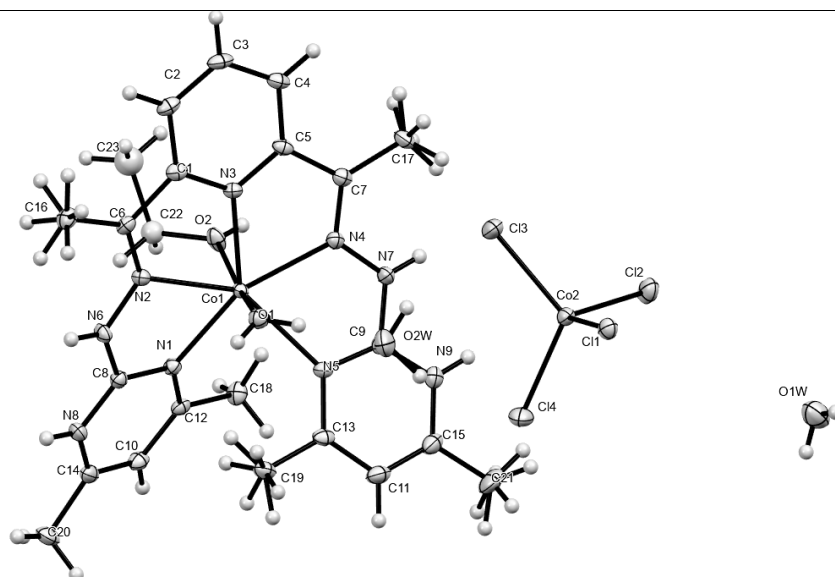

**Compound 2a**

| Parameter        | Value      | Parameter | Value      | Parameter | Value      |
|------------------|------------|-----------|------------|-----------|------------|
| Bond lengths, Å  |            |           |            |           |            |
| Co1-O1           | 2.1572(18) | N8-C8     | 1.332(3)   | Co1-O2    | 2.1844(19) |
| N9-C15           | 1.337(3)   | Co1-N1    | 2.230(2)   | N9-C9     | 1.329(3)   |
| Co1-N2           | 2.172(2)   | C1-C2     | 1.397(3)   | Co1-N3    | 2.155(2)   |
| C1-C6            | 1.483(3)   | Co1-N4    | 2.171(2)   | C2-C3     | 1.385(4)   |
| Co1-N5           | 2.325(2)   | C3-C4     | 1.387(4)   | Co2-Cl1   | 2.2968(7)  |
| C4-C5            | 1.398(3)   | Co2-Cl2   | 2.2669(7)  | C5-C7     | 1.486(3)   |
| Co2-Cl3          | 2.2864(8)  | Co2-Cl4   | 2.2741(7)  | C6-C16    | 1.489(4)   |
| O2-C22           | 1.439(4)   | C7-C17    | 1.497(4)   | N1-C8     | 1.345(3)   |
| N1-C12           | 1.357(3)   | C10-C14   | 1.391(4)   | N2-C6     | 1.290(3)   |
| C10-C12          | 1.386(3)   | C11-C13   | 1.380(4)   | N2-N6     | 1.355(3)   |
| C11-C15          | 1.379(4)   | N3-C1     | 1.337(3)   | C12-C18   | 1.500(3)   |
| N3-C5            | 1.338(3)   | C13-C19   | 1.493(4)   | N4-C7     | 1.288(3)   |
| C14-C20          | 1.496(4)   | N4-N7     | 1.357(3)   | C15-C21   | 1.493(4)   |
| N5-C13           | 1.359(3)   | C22-C23   | 1.504(4)   | N5-C9     | 1.335(3)   |
| N6-C8            | 1.373(3)   | N7-C9     | 1.387(3)   | N8-C14    | 1.338(3)   |
| Bond angles, deg |            |           |            |           |            |
| O1-Co1-O2        | 167.03(7)  | O1-Co1-N1 | 107.69(7)  | O1-Co1-N2 | 79.41(7)   |
| O1-Co1-N3        | 84.65(7)   | O1-Co1-N4 | 95.64(7)   | Co1-N1-C8 | 112.82(15) |
| O1-Co1-N5        | 79.84(7)   | O2-Co1-N1 | 80.96(7)   | Co1-N2-C6 | 121.48(16) |
| O2-Co1-N2        | 94.70(8)   | N6-N2-C6  | 122.8(2)   | O2-Co1-N3 | 82.52(8)   |
| Co1-N2-N6        | 114.19(14) | O2-Co1-N4 | 82.04(8)   | O2-Co1-N5 | 111.07(7)  |
| N1-Co1-N2        | 71.66(7)   | Co1-N3-C1 | 119.06(16) | N1-Co1-N3 | 138.01(8)  |
| C1-N3-C5         | 121.3(2)   | N1-Co1-N4 | 142.69(8)  | Co1-N3-C5 | 119.54(16) |
| N1-Co1-N5        | 84.96(7)   | N7-N4-C7  | 119.8(2)   | N2-Co1-N3 | 71.58(8)   |
| Co1-N4-C7        | 121.69(17) | N2-Co1-N4 | 142.87(8)  | Co1-N4-N7 | 118.15(15) |
| N2-Co1-N5        | 142.01(7)  | Co1-N5-C9 | 113.59(15) | N3-Co1-N4 | 71.33(8)   |
| N3-Co1-N5        | 137.04(7)  | N4-Co1-N5 | 70.69(7)   | N2-N6-C8  | 115.9(2)   |
| N4-N7-C9         | 115.83(19) | N3-C1-C6  | 114.6(2)   | N3-C5-C7  | 113.9(2)   |
| N2-C6-C1         | 111.9(2)   | N4-C7-C5  | 112.6(2)   | N5-C9-N7  | 117.7(2)   |
| N1-C8-N6         | 117.0(2)   |           |            |           |            |

| Torsion angles, deg                                                                |            |            |            |            |            |
|------------------------------------------------------------------------------------|------------|------------|------------|------------|------------|
| 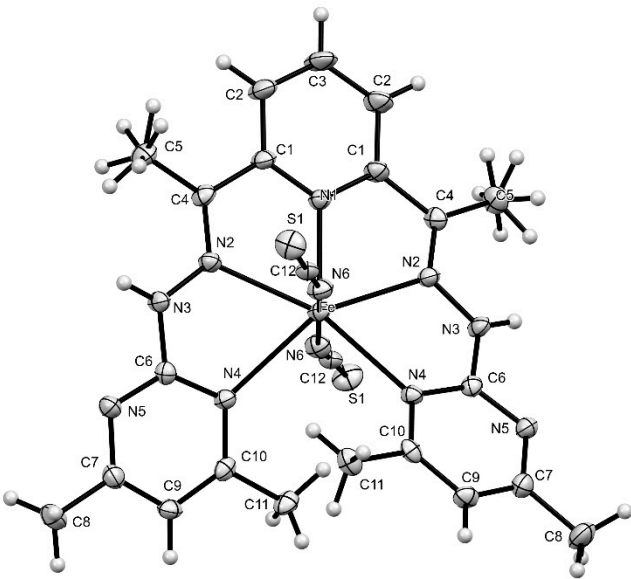 |            |            |            |            |            |
| Compound 3                                                                         |            |            |            |            |            |
| Parameter                                                                          | Value      | Parameter  | Value      | Parameter  | Value      |
| Bond lengths, Å                                                                    |            |            |            |            |            |
| Fe-N1                                                                              | 2.240(2)   | Fe-N2      | 2.318(3)   | Fe-N4      | 2.481(2)   |
| Fe-N6                                                                              | 2.095(2)   | Fe-N2a     | 2.318(3)   | Fe-N4a     | 2.481(3)   |
| Fe-N6a                                                                             | 2.095(2)   | S1-C12     | 1.630(3)   | N1-C1a     | 1.346(5)   |
| N1-C1                                                                              | 1.346(4)   | N2-N3      | 1.365(3)   | N2-C4      | 1.293(4)   |
| N3-C6                                                                              | 1.377(4)   | N4-C6      | 1.343(4)   | N4-C10     | 1.350(4)   |
| N5-C7                                                                              | 1.345(4)   | N5-C6      | 1.329(4)   | N6-C12     | 1.162(4)   |
| C1-C2                                                                              | 1.394(4)   | C1-C4      | 1.467(4)   | C2-C3      | 1.377(5)   |
| C4-C5                                                                              | 1.502(5)   | C7-C9      | 1.379(5)   | C7-C8      | 1.497(4)   |
| C9-C10                                                                             | 1.377(4)   | C10-C11    | 1.500(5)   |            |            |
| Bond angles, deg                                                                   |            |            |            |            |            |
| N1-Fe-N2                                                                           | 68.70(7)   | N1-Fe-N4   | 133.22(7)  | N1-Fe-N6   | 93.17(7)   |
| N1-Fe-N2a                                                                          | 68.71(8)   | N1-Fe-N4a  | 133.22(7)  | N1-Fe-N6a  | 93.15(8)   |
| N2-Fe-N4                                                                           | 66.93(8)   | N2-Fe-N6   | 79.50(9)   | N2-Fe-N2a  | 137.41(9)  |
| N2-Fe-N4a                                                                          | 152.79(8)  | N2-Fe-N6a  | 102.85(9)  | N4-Fe-N6   | 92.76(8)   |
| N2a-Fe-N4                                                                          | 152.78(9)  | N4-Fe-N4a  | 93.56(8)   | N4-Fe-N6a  | 82.90(8)   |
| N2a-Fe-N6                                                                          | 102.86(9)  | N4a-Fe-N6  | 82.89(9)   | N6-Fe-N6a  | 173.68(10) |
| N2a-Fe-N4a                                                                         | 66.92(9)   | N2a-Fe-N6a | 79.49(9)   | N4a-Fe-N6a | 92.77(9)   |
| Fe-N1-C1                                                                           | 120.26(18) | C1-N1-C1a  | 119.5(3)   | Fe-N1-C1a  | 120.26(18) |
| N3-N2-C4                                                                           | 119.6(3)   | Fe-N2-C4   | 119.52(19) | Fe-N2-N3   | 117.82(19) |
| N2-N3-C6                                                                           | 117.6(3)   | C6-N4-C10  | 114.6(2)   | Fe-N4-C6   | 113.73(16) |
| Fe-N4-C10                                                                          | 131.4(2)   | C6-N5-C7   | 115.5(3)   | Fe-N6-C12  | 166.0(3)   |
| C2-C1-C4                                                                           | 123.2(3)   | N1-C1-C2   | 121.5(3)   | N1-C1-C4   | 115.3(3)   |
| C1-C2-C3                                                                           | 118.8(3)   | C2-C3-C2a  | 119.9(3)   | N2-C4-C5   | 125.5(3)   |
| C1-C4-C5                                                                           | 120.6(2)   | N2-C4-C1   | 113.8(3)   | N4-C6-N5   | 128.3(3)   |
| N3-C6-N4                                                                           | 118.3(2)   | N3-C6-N5   | 113.4(3)   | N5-C7-C8   | 116.8(3)   |
| C8-C7-C9                                                                           | 122.1(3)   | N5-C7-C9   | 121.1(3)   | C7-C9-C10  | 118.7(3)   |
| N4-C10-C9                                                                          | 121.5(3)   | C9-C10-C11 | 119.8(3)   | N4-C10-C11 | 118.7(2)   |



|                     |             |               |             |               |             |
|---------------------|-------------|---------------|-------------|---------------|-------------|
| S1-C12-N6           | 178.9(2)    |               |             |               |             |
| Torsion angles, deg |             |               |             |               |             |
| N2-Fe-N1-C1         | 7.68(13)    | N2-Fe-N1-C1a  | -172.31(13) | N4-Fe-N1-C1   | 27.03(14)   |
| N4-Fe-N1-C1a        | -152.95(13) | N6-Fe-N1-C1   | -69.76(14)  | N6-Fe-N1-C1a  | 110.26(14)  |
| N2a-Fe-N1-C1        | -172.33(13) | N4a-Fe-N1-C1  | -152.97(13) | N6a-Fe-N1-C1  | 110.24(14)  |
| N1-Fe-N2-N3         | -174.30(18) | N1-Fe-N2-C4   | -14.05(17)  | N4-Fe-N2-N3   | 20.92(16)   |
| N4-Fe-N2-C4         | -178.8(2)   | N6-Fe-N2-N3   | -76.68(18)  | N6-Fe-N2-C4   | 83.57(19)   |
| N2a-Fe-N2-N3        | -174.30(15) | N2a-Fe-N2-C4  | -14.1(2)    | N4a-Fe-N2-N3  | -26.2(3)    |
| N4a-Fe-N2-C4        | 134.08(19)  | N6a-Fe-N2-N3  | 97.33(18)   | N6a-Fe-N2-C4  | -102.42(19) |
| N1-Fe-N4-C6         | -36.17(18)  | N1-Fe-N4-C10  | 150.33(18)  | N2-Fe-N4-C6   | -16.56(15)  |
| N2-Fe-N4-C10        | 169.9(2)    | N6-Fe-N4-C6   | 60.79(17)   | N6-Fe-N4-C10  | -112.7(2)   |
| N2a-Fe-N4-C6        | -173.71(17) | N2a-Fe-N4-C10 | 12.8(3)     | N4a-Fe-N4-C6  | 143.83(16)  |
| N4a-Fe-N4-C10       | -29.7(2)    | N6a-Fe-N4-C6  | -123.82(18) | N6a-Fe-N4-C10 | 62.7(2)     |
| Fe-N1-C1-C4         | -1.9(2)     | C1a-N1-C1-C2  | -0.2(3)     | C1a-N1-C1-C4  | 178.07(18)  |
| Fe-N1-C1-C2         | 179.8(2)    | N3-N2-C4-C1   | 177.6(2)    | N3-N2-C4-C5   | 1.2(4)      |
| Fe-N2-N3-C6         | -24.2(3)    | C4-N2-N3-C6   | 175.6(2)    | Fe-N2-C4-C1   | 17.7(3)     |
| Fe-N2-C4-C5         | -158.7(2)   | N2-N3-C6-N5   | -172.8(2)   | N2-N3-C6-N4   | 7.4(3)      |
| Fe-N4-C6-N3         | 11.2(3)     | Fe-N4-C10-C11 | -12.5(3)    | C6-N4-C10-C9  | -4.7(3)     |
| C6-N4-C10-C11       | 174.0(2)    | Fe-N4-C6-N5   | -168.5(2)   | C10-N4-C6-N3  | -174.1(2)   |
| C10-N4-C6-N5        | 6.1(4)      | Fe-N4-C10-C9  | 168.72(17)  | C6-N5-C7-C9   | -3.5(3)     |
| C7-N5-C6-N3         | 178.2(2)    | C7-N5-C6-N4   | -2.1(4)     | C6-N5-C7-C8   | 176.4(2)    |
| C4-C1-C2-C3         | -177.7(2)   | N1-C1-C4-N2   | -10.3(3)    | N1-C1-C4-C5   | 166.2(2)    |
| N1-C1-C2-C3         | 0.4(4)      | C2-C1-C4-N2   | 168.0(3)    | C2-C1-C4-C5   | -15.5(4)    |
| C1-C2-C3-C2a        | -0.2(4)     | C8-C7-C9-C10  | -175.4(2)   | N5-C7-C9-C10  | 4.5(4)      |
| C7-C9-C10-N4        | -0.1(4)     | C7-C9-C10-C11 | -178.8(2)   |               |             |

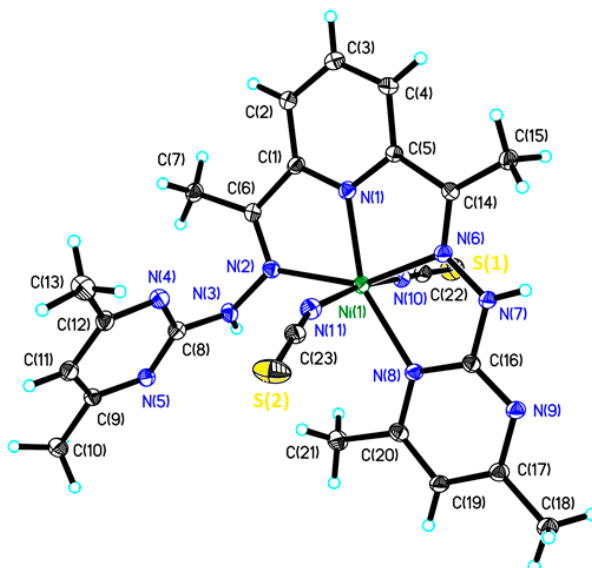

**Compound 4**

| Parameter       | Value    | Parameter | Value    | Parameter | Value    |
|-----------------|----------|-----------|----------|-----------|----------|
| Bond lengths, Å |          |           |          |           |          |
| Ni1-N3          | 2.049(3) | Ni1-N4    | 2.011(3) | Ni1-N5    | 2.179(3) |
| Ni1-N6          | 2.032(4) | Ni1-N7    | 2.155(3) | Ni1-N8    | 2.030(4) |
| S1-C22          | 1.634(6) | S2-C23    | 1.629(5) | N1-C2     | 1.347(6) |
| N1-C6           | 1.329(5) | N2-N3     | 1.355(5) | N2-C6     | 1.383(5) |

|                     |           |               |            |               |           |
|---------------------|-----------|---------------|------------|---------------|-----------|
| N3-C7               | 1.291(6)  | N4-C9         | 1.345(5)   | N4-C13        | 1.334(5)  |
| N5-N9               | 1.401(5)  | N5-C14        | 1.290(5)   | N6-C23        | 1.159(6)  |
| N7-C4               | 1.338(5)  | N7-C6         | 1.347(5)   | N8-C22        | 1.132(7)  |
| N9-C16              | 1.368(5)  | N10-C16       | 1.341(5)   | N10-C17       | 1.341(6)  |
| N11-C16             | 1.350(5)  | N11-C20       | 1.340(5)   | C1-C2         | 1.490(6)  |
| C2-C3               | 1.396(5)  | C3-C4         | 1.385(6)   | C4-C5         | 1.507(5)  |
| C7-C9               | 1.489(5)  | C7-C8         | 1.488(5)   | N2-H2         | 0.8600    |
| N9-H9               | 0.8600    | C9-C10        | 1.396(6)   | C10-C11       | 1.384(6)  |
| C11-C12             | 1.382(7)  | C12-C13       | 1.389(6)   | C13-C14       | 1.486(5)  |
| C14-C15             | 1.490(6)  | C17-C19       | 1.392(6)   | C17-C18       | 1.507(7)  |
| C19-C20             | 1.386(6)  | C20-C21       | 1.501(6)   |               |           |
| Bond angles, deg    |           |               |            |               |           |
| N3-Ni1-N4           | 76.89(14) | N3-Ni1-N5     | 152.20(13) | N3-Ni1-N6     | 93.86(14) |
| N3-Ni1-N7           | 76.54(13) | N3-Ni1-N8     | 94.01(15)  | N4-Ni1-N5     | 75.36(13) |
| N4-Ni1-N6           | 93.54(14) | N4-Ni1-N7     | 153.38(13) | N4-Ni1-N8     | 95.79(16) |
| N5-Ni1-N6           | 89.49(14) | N5-Ni1-N7     | 131.12(13) | N5-Ni1-N8     | 87.16(15) |
| N6-Ni1-N7           | 89.86(14) | N6-Ni1-N8     | 168.95(15) | N7-Ni1-N8     | 84.45(15) |
| C2-N1-C6            | 116.3(3)  | N3-N2-C6      | 116.4(3)   | Ni1-N3-N2     | 116.8(2)  |
| Ni1-N3-C7           | 119.7(3)  | N2-N3-C7      | 123.5(3)   | Ni1-N4-C9     | 117.2(3)  |
| Ni1-N4-C13          | 120.3(3)  | C9-N4-C13     | 122.4(3)   | Ni1-N5-N9     | 128.2(3)  |
| Ni1-N5-C14          | 115.7(3)  | N9-N5-C14     | 115.6(3)   | Ni1-N6-C23    | 178.1(3)  |
| Ni1-N7-C4           | 130.9(3)  | Ni1-N7-C6     | 112.9(2)   | C4-N7-C6      | 116.1(3)  |
| Ni1-N8-C22          | 161.9(4)  | N5-N9-C16     | 121.8(3)   | C16-N10-C17   | 115.8(4)  |
| C16-N11-C20         | 116.5(3)  | N1-C2-C1      | 117.5(3)   | N1-C2-C3      | 120.7(4)  |
| C1-C2-C3            | 121.8(4)  | N3-N2-H2      | 122.00     | C6-N2-H2      | 122.00    |
| C2-C3-C4            | 118.4(4)  | N7-C4-C5      | 116.2(4)   | N7-C4-C3      | 121.2(4)  |
| C3-C4-C5            | 122.6(4)  | N2-C6-N7      | 117.4(3)   | N1-C6-N2      | 115.3(3)  |
| N1-C6-N7            | 127.3(3)  | N3-C7-C9      | 111.8(3)   | N3-C7-C8      | 125.1(4)  |
| C8-C7-C9            | 123.0(4)  | N4-C9-C10     | 119.7(3)   | N4-C9-C7      | 114.4(3)  |
| N5-N9-H9            | 119.00    | C16-N9-H9     | 119.00     | C7-C9-C10     | 125.9(3)  |
| C9-C10-C11          | 118.2(4)  | C10-C11-C12   | 121.1(5)   | C11-C12-C13   | 118.2(4)  |
| N4-C13-C14          | 113.7(4)  | C12-C13-C14   | 125.9(4)   | N4-C13-C12    | 120.4(4)  |
| C13-C14-C15         | 120.1(4)  | N5-C14-C13    | 114.7(4)   | N5-C14-C15    | 125.2(4)  |
| N9-C16-N11          | 114.4(3)  | N10-C16-N11   | 126.7(4)   | N9-C16-N10    | 118.9(3)  |
| N10-C17-C18         | 117.2(4)  | N10-C17-C19   | 121.8(4)   | C18-C17-C19   | 121.1(5)  |
| C17-C19-C20         | 118.1(4)  | N11-C20-C19   | 121.1(4)   | C19-C20-C21   | 121.3(4)  |
| N11-C20-C21         | 117.7(4)  | S1-C22-N8     | 178.7(5)   | S2-C23-N6     | 177.5(4)  |
| Torsion angles, deg |           |               |            |               |           |
| N4-Ni1-N3-N2        | 177.4(3)  | N4-Ni1-N3-C7  | -0.1(4)    | N5-Ni1-N3-N2  | 173.9(3)  |
| N5-Ni1-N3-C7        | -3.6(5)   | N6-Ni1-N3-N2  | -89.9(3)   | N6-Ni1-N3-C7  | 92.7(4)   |
| N7-Ni1-N3-N2        | -0.9(3)   | N7-Ni1-N3-C7  | -178.4(4)  | N8-Ni1-N3-N2  | 82.4(3)   |
| N8-Ni1-N3-C7        | -95.1(4)  | N3-Ni1-N4-C9  | 2.4(3)     | N3-Ni1-N4-C13 | 178.9(3)  |
| N5-Ni1-N4-C9        | -179.3(3) | N5-Ni1-N4-C13 | -2.8(3)    | N6-Ni1-N4-C9  | -90.8(3)  |
| N6-Ni1-N4-C13       | 85.8(3)   | N7-Ni1-N4-C9  | 6.0(5)     | N7-Ni1-N4-C13 | -177.5(3) |
| N8-Ni1-N4-C9        | 95.2(3)   | N8-Ni1-N4-C13 | -88.3(3)   | N3-Ni1-N5-N9  | -168.0(3) |
| N3-Ni1-N5-C14       | 3.6(5)    | N4-Ni1-N5-N9  | -171.5(4)  | N4-Ni1-N5-C14 | 0.1(3)    |

|                 |           |                 |           |                 |           |
|-----------------|-----------|-----------------|-----------|-----------------|-----------|
| N6-Ni1-N5-N9    | 94.7(3)   | N6-Ni1-N5-C14   | -93.7(3)  | N7-Ni1-N5-N9    | 5.4(4)    |
| N7-Ni1-N5-C14   | 177.0(3)  | N8-Ni1-N5-N9    | -74.7(3)  | N8-Ni1-N5-C14   | 96.9(3)   |
| N3-Ni1-N7-C4    | 176.0(4)  | N3-Ni1-N7-C6    | 0.9(3)    | N4-Ni1-N7-C4    | 172.3(3)  |
| N4-Ni1-N7-C6    | -2.8(5)   | N5-Ni1-N7-C4    | -0.9(4)   | N5-Ni1-N7-C6    | -175.9(2) |
| N6-Ni1-N7-C4    | -90.0(4)  | N6-Ni1-N7-C6    | 94.9(3)   | N8-Ni1-N7-C4    | 80.5(4)   |
| N8-Ni1-N7-C6    | -94.6(3)  | C6-N1-C2-C1     | -177.9(4) | C6-N1-C2-C3     | 0.6(7)    |
| C2-N1-C6-N2     | 177.0(4)  | C2-N1-C6-N7     | -2.0(6)   | C6-N2-N3-Ni1    | 0.9(4)    |
| C6-N2-N3-C7     | 178.2(4)  | N3-N2-C6-N1     | -179.1(3) | N3-N2-C6-N7     | 0.0(5)    |
| Ni1-N3-C7-C8    | 175.8(4)  | Ni1-N3-C7-C9    | -1.9(5)   | N2-N3-C7-C8     | -1.5(8)   |
| N2-N3-C7-C9     | -179.2(4) | Ni1-N4-C9-C7    | -4.1(5)   | Ni1-N4-C9-C10   | 177.1(3)  |
| C13-N4-C9-C7    | 179.5(4)  | C13-N4-C9-C10   | 0.7(6)    | Ni1-N4-C13-C12  | -176.4(3) |
| Ni1-N4-C13-C14  | 4.7(5)    | C9-N4-C13-C12   | -0.1(6)   | C9-N4-C13-C14   | -179.0(3) |
| Ni1-N5-N9-C16   | 97.3(4)   | C14-N5-N9-C16   | -74.3(5)  | Ni1-N5-C14-C13  | 2.2(4)    |
| Ni1-N5-C14-C15  | -177.9(3) | N9-N5-C14-C13   | 174.8(3)  | N9-N5-C14-C15   | -5.3(6)   |
| Ni1-N7-C4-C3    | -176.3(3) | Ni1-N7-C4-C5    | 4.2(5)    | C6-N7-C4-C3     | -1.3(6)   |
| C6-N7-C4-C5     | 179.1(4)  | Ni1-N7-C6-N1    | 178.2(3)  | Ni1-N7-C6-N2    | -0.8(4)   |
| C4-N7-C6-N1     | 2.4(6)    | C4-N7-C6-N2     | -176.6(3) | N5-N9-C16-N10   | 8.3(6)    |
| N5-N9-C16-N11   | -172.8(3) | C17-N10-C16-N9  | -177.8(4) | C17-N10-C16-N11 | 3.4(6)    |
| C16-N10-C17-C18 | 175.1(4)  | C16-N10-C17-C19 | -4.0(6)   | C20-N11-C16-N9  | -179.2(3) |
| C20-N11-C16-N10 | -0.3(6)   | C16-N11-C20-C19 | -2.1(6)   | C16-N11-C20-C21 | 178.8(4)  |
| N1-C2-C3-C4     | 0.2(7)    | C1-C2-C3-C4     | 178.6(4)  | C2-C3-C4-N7     | 0.2(7)    |
| C2-C3-C4-C5     | 179.7(4)  | N3-C7-C9-N4     | 3.8(6)    | N3-C7-C9-C10    | -177.5(4) |
| C8-C7-C9-N4     | -173.9(4) | C8-C7-C9-C10    | 4.8(7)    | N4-C9-C10-C11   | -1.9(7)   |
| C7-C9-C10-C11   | 179.4(5)  | C9-C10-C11-C12  | 2.6(8)    | C10-C11-C12-C13 | -2.0(8)   |
| C11-C12-C13-N4  | 0.7(7)    | C11-C12-C13-C14 | 179.5(4)  | N4-C13-C14-N5   | -4.4(5)   |
| N4-C13-C14-C15  | 175.7(4)  | C12-C13-C14-N5  | 176.8(4)  | C12-C13-C14-C15 | -3.1(6)   |
| N10-C17-C19-C20 | 1.9(6)    | C18-C17-C19-C20 | -177.2(4) | C17-C19-C20-N11 | 1.4(6)    |
| C17-C19-C20-C21 | -179.5(4) |                 |           |                 |           |

**Table S3.** Crystallographic data for **1-4**

| Parameters                          | <b>1</b>                                                                        | <b>2</b>                                                                            | <b>2a</b>                                                                                                 | <b>3</b>                                                          | <b>4</b>                                                         |
|-------------------------------------|---------------------------------------------------------------------------------|-------------------------------------------------------------------------------------|-----------------------------------------------------------------------------------------------------------|-------------------------------------------------------------------|------------------------------------------------------------------|
| Chemical formula                    | C <sub>29</sub> H <sub>43</sub> CoN <sub>11</sub> O <sub>3</sub> S <sub>5</sub> | C <sub>21</sub> H <sub>29</sub> Cl <sub>2</sub> CoN <sub>9</sub> O <sub>10.75</sub> | C <sub>23</sub> H <sub>33</sub> CoN <sub>9</sub> O <sub>2</sub> , C <sub>14</sub> Co, 2(H <sub>2</sub> O) | C <sub>25</sub> H <sub>30</sub> FeN <sub>11</sub> OS <sub>3</sub> | C <sub>25</sub> H <sub>28</sub> N <sub>12</sub> NiS <sub>2</sub> |
| Molecular weight, g/mole            | 812.97                                                                          | 709.36                                                                              | 763.28                                                                                                    | 652.63                                                            | 619.42                                                           |
| Temperature, K                      | 100.0(1)                                                                        | 100.0(1)                                                                            | 100.0(1)                                                                                                  | 101(2)                                                            | 100(2)                                                           |
| CCDC                                | 2043149                                                                         | 2141475                                                                             | 2194696                                                                                                   | 2141312                                                           | 2141313                                                          |
| Crystal symmetry                    | Triclinic                                                                       | Monoclinic                                                                          | Monoclinic                                                                                                | Hexagonal                                                         | Orthorhombic                                                     |
| Space group                         | P -1                                                                            | C 1 2/c 1                                                                           | P21/n                                                                                                     | P 31 2 1                                                          | P 21 21 21                                                       |
| Unit cell dimensions                |                                                                                 |                                                                                     |                                                                                                           |                                                                   |                                                                  |
| <i>a</i> , Å                        | 9.4207(4)                                                                       | 20.827(4)                                                                           | 10.6168(3)                                                                                                | 14.9564(5)                                                        | 8.4760(17)                                                       |
| <i>b</i> , Å                        | 12.6341(5)                                                                      | 17.085(3)                                                                           | 18.3834(6)                                                                                                | 14.9564(5)                                                        | 18.025(4)                                                        |
| <i>c</i> , Å                        | 17.0803(7)                                                                      | 19.299(4)                                                                           | 16.3496(5)                                                                                                | 11.5048(4)                                                        | 18.913(4)                                                        |
| $\alpha$ , °                        | 109.380(4)                                                                      | 90                                                                                  | 90                                                                                                        | 90                                                                | 90                                                               |
| $\beta$ , °                         | 93.196(4)                                                                       | 122.33(3)                                                                           | 91.253(3)                                                                                                 | 90                                                                | 90                                                               |
| $\gamma$ , °                        | 99.822(3)                                                                       | 90                                                                                  | 90                                                                                                        | 120.0                                                             | 90.0                                                             |
| Volume ( <i>V</i> ), Å <sup>3</sup> | 1875.79(13)                                                                     | 5803(2)                                                                             | 3190.24(17)                                                                                               | 2228.76(13)                                                       | 2889.5(1)                                                        |
| Z                                   | 2                                                                               | 8                                                                                   | 4                                                                                                         | 3                                                                 | 4                                                                |

|                                            |                                  |                                  |                                  |                                |                                          |
|--------------------------------------------|----------------------------------|----------------------------------|----------------------------------|--------------------------------|------------------------------------------|
| Density calc.( $\rho$ ), g/cm <sup>3</sup> | 1.439                            | 1.624                            | 1.589                            | 1.445                          | 1.424                                    |
| $\mu$ (MoK $\alpha$ ), mm <sup>-1</sup>    | 0.783                            | 0.848                            | 1.420                            | 0.759                          | 1.151                                    |
| Crystal size, mm                           | 0.40×0.38×0.36                   | 0.35×0.34×0.32                   | 0.15 x 0.25 x 0.40               | 0.38x0.35x0.30                 | 0.50 x 0.10 x 0.01                       |
| Theta range for data collection            | ≤ 30.08                          | ≤ 26.0                           | 2.9, 29.6                        | ≤ 29.07                        | ≤ 30.971                                 |
| Measured reflections                       | 21524                            | 11999                            | 16820                            | 7535                           | 16786                                    |
| Independent reflections >2 $\theta$ (I)    | 12033/9861                       | 5670/4521                        | 8859/6879                        | 3833/3331                      | 6476/5851                                |
| Index ranges                               | -13<h<11<br>-18<k<18<br>-24<l<22 | -24<h<25<br>-21<k<13<br>-22<l<23 | -14<h<13<br>-22<k<25<br>-20<l<22 | -5<h<20<br>-17<k<17<br>-15<l<5 | -10<=h<=10,<br>-23<=k<=14,<br>-24<=l<=24 |
| Number of parameters refined               | 452                              | 407                              | 413                              | 192                            | 368                                      |
| Goodness-of-fit                            | 1.133                            | 1.072                            | 0.988                            | 1.049                          | 1.060                                    |
| Final R indices                            | R <sub>1</sub> = 0.0694          | R <sub>1</sub> = 0.0648          | 0.0394                           | 0.0409                         | R <sub>1</sub> = 0.0425                  |

**Table S4.** Optimized nuclei coordinates for **1-4** used for molecular modelling of the magnetic properties. Non-hydrogen atoms are fixed from the X-ray diffraction experiment, position of hydrogen atoms are optimized at BP86/def2-TZVP level of theory

| Compound (1) |              |              |              |
|--------------|--------------|--------------|--------------|
| 27           | 0.000000000  | 0.000000000  | 0.000000000  |
| 16           | 0.901795000  | -0.786350000 | 4.730219000  |
| 16           | -1.338036000 | 1.045799000  | -4.567067000 |
| 7            | 1.861004000  | 1.105226000  | -0.246025000 |
| 7            | -1.603483000 | 2.637918000  | 0.716531000  |
| 1            | -1.851884000 | 3.624880000  | 0.787029000  |
| 7            | -0.362168000 | 2.202595000  | 0.415089000  |
| 7            | -0.861123000 | -2.053807000 | -0.702337000 |
| 7            | 1.342324000  | -2.734111000 | -0.429801000 |
| 1            | 2.028501000  | -3.475892000 | -0.296890000 |
| 7            | -2.130317000 | 0.425473000  | 1.226189000  |
| 7            | 1.645580000  | -1.415097000 | -0.445996000 |
| 6            | 0.657869000  | -0.642262000 | 3.114785000  |
| 6            | -0.857881000 | 0.765258000  | -3.033540000 |
| 7            | 0.502500000  | -0.502758000 | 1.971783000  |
| 7            | -0.238192000 | -4.374676000 | -0.542509000 |
| 7            | -3.643424000 | 2.253819000  | 1.632467000  |
| 7            | -0.530517000 | 0.585051000  | -1.931382000 |
| 6            | 2.862805000  | -1.018705000 | -0.568013000 |
| 6            | 3.003620000  | 0.446013000  | -0.485950000 |
| 6            | 1.875832000  | 2.449370000  | -0.158275000 |
| 6            | 4.220713000  | 1.104974000  | -0.625295000 |
| 1            | 5.144369000  | 0.556587000  | -0.797970000 |
| 6            | -2.502517000 | 1.718605000  | 1.213105000  |
| 6            | 0.013732000  | -3.069250000 | -0.551641000 |
| 6            | 0.572823000  | 3.057203000  | 0.148632000  |
| 6            | 0.399221000  | 4.545775000  | 0.153221000  |
| 1            | 0.261963000  | 4.938505000  | 1.175083000  |
| 1            | 1.257470000  | 5.057975000  | -0.288528000 |
| 1            | -0.484870000 | 4.841445000  | -0.436371000 |
| 6            | 3.056295000  | 3.180756000  | -0.301170000 |
| 1            | 3.068079000  | 4.265007000  | -0.211397000 |
| 6            | -1.505854000 | -4.723035000 | -0.776257000 |

|                     |               |              |               |
|---------------------|---------------|--------------|---------------|
| 6                   | 4.044093000   | -1.902441000 | -0.788251000  |
| 1                   | 3.775063000   | -2.780623000 | -1.395566000  |
| 1                   | 4.842799000   | -1.376329000 | -1.321462000  |
| 1                   | 4.467943000   | -2.270255000 | 0.161552000   |
| 6                   | 4.228987000   | 2.487378000  | -0.537903000  |
| 1                   | 5.169194000   | 3.031602000  | -0.644738000  |
| 6                   | -4.497325000  | 1.411899000  | 2.226096000   |
| 6                   | -4.175753000  | 0.071459000  | 2.404139000   |
| 1                   | -4.845213000  | -0.601253000 | 2.939728000   |
| 6                   | -2.986557000  | -0.393022000 | 1.884273000   |
| 6                   | -3.101042000  | -1.370281000 | -1.406675000  |
| 1                   | -2.888872000  | -0.437346000 | -0.878528000  |
| 1                   | -3.022368000  | -1.146344000 | -2.483215000  |
| 1                   | -4.130643000  | -1.695750000 | -1.207135000  |
| 6                   | -2.115044000  | -2.439413000 | -1.050744000  |
| 6                   | -2.462606000  | -3.771649000 | -1.107742000  |
| 1                   | -3.477603000  | -4.066593000 | -1.372964000  |
| 6                   | -2.587253000  | -1.826538000 | 2.063749000   |
| 1                   | -2.837627000  | -2.155140000 | 3.082762000   |
| 1                   | -3.139045000  | -2.480278000 | 1.371176000   |
| 1                   | -1.514908000  | -1.958635000 | 1.900511000   |
| 6                   | -1.839321000  | -6.179889000 | -0.670953000  |
| 1                   | -1.170750000  | -6.776371000 | -1.308719000  |
| 1                   | -1.682647000  | -6.526732000 | 0.362496000   |
| 1                   | -2.879536000  | -6.382284000 | -0.954956000  |
| 6                   | -5.789270000  | 1.986881000  | 2.712570000   |
| 1                   | -6.297686000  | 2.524392000  | 1.898938000   |
| 1                   | -6.459224000  | 1.212007000  | 3.103874000   |
| 1                   | -5.601660000  | 2.723658000  | 3.508243000   |
| <b>Compound (2)</b> |               |              |               |
| 27                  | -8.293963000  | 4.886328000  | -10.612583000 |
| 8                   | -8.156455000  | 4.624618000  | -12.816167000 |
| 1                   | -7.391054000  | 5.016950000  | -13.273342000 |
| 1                   | -8.326350000  | 3.771022000  | -13.254054000 |
| 7                   | -6.213180000  | 4.475774000  | -10.317308000 |
| 7                   | -11.285415000 | 4.826082000  | -10.954537000 |
| 1                   | -12.246187000 | 4.502574000  | -11.084998000 |
| 7                   | -12.196266000 | 6.788023000  | -10.178161000 |
| 7                   | -5.415317000  | 5.575962000  | -10.208514000 |
| 1                   | -4.421792000  | 5.527392000  | -9.975705000  |
| 7                   | -7.164782000  | 6.695950000  | -11.235669000 |
| 7                   | -5.064626000  | 7.764496000  | -10.791132000 |
| 7                   | -9.846172000  | 6.347574000  | -9.926306000  |
| 7                   | -8.016987000  | 2.764313000  | -10.610717000 |
| 7                   | -10.222356000 | 3.968628000  | -10.902263000 |
| 6                   | -9.732205000  | 7.489468000  | -9.190277000  |
| 6                   | -6.810783000  | 2.251238000  | -10.348602000 |
| 6                   | -11.097098000 | 6.057968000  | -10.309470000 |
| 6                   | -5.908263000  | 6.739395000  | -10.769532000 |
| 6                   | -6.754441000  | 8.905743000  | -12.004359000 |
| 1                   | -7.084775000  | 9.789328000  | -12.550068000 |
| 6                   | -5.765127000  | 3.279916000  | -10.114335000 |

|              |               |              |               |
|--------------|---------------|--------------|---------------|
| 6            | -5.506422000  | 8.870461000  | -11.413117000 |
| 6            | -8.937445000  | 7.798212000  | -12.526237000 |
| 1            | -9.341164000  | 6.787125000  | -12.631987000 |
| 1            | -9.637713000  | 8.404016000  | -11.930486000 |
| 1            | -8.897616000  | 8.268351000  | -13.519169000 |
| 6            | -9.063753000  | 1.969813000  | -10.929108000 |
| 6            | -8.909330000  | 0.593278000  | -11.004208000 |
| 1            | -9.741484000  | -0.058704000 | -11.265002000 |
| 6            | -11.582547000 | 1.994455000  | -11.531680000 |
| 1            | -12.171457000 | 2.579079000  | -12.255327000 |
| 1            | -11.360252000 | 1.031807000  | -12.002542000 |
| 1            | -12.233388000 | 1.791770000  | -10.663495000 |
| 6            | -6.598921000  | 0.872860000  | -10.363630000 |
| 1            | -5.622906000  | 0.447538000  | -10.136830000 |
| 6            | -7.659366000  | 0.046066000  | -10.710014000 |
| 1            | -7.517938000  | -1.034213000 | -10.748971000 |
| 6            | -10.828061000 | 8.286831000  | -8.936871000  |
| 1            | -10.726091000 | 9.186628000  | -8.331442000  |
| 6            | -12.053601000 | 7.927517000  | -9.478947000  |
| 6            | -10.340687000 | 2.708505000  | -11.128827000 |
| 6            | -4.547035000  | 10.021217000 | -11.481070000 |
| 1            | -4.118028000  | 10.218364000 | -10.489052000 |
| 1            | -3.705404000  | 9.755496000  | -12.139627000 |
| 1            | -5.020232000  | 10.930663000 | -11.867660000 |
| 6            | -7.581856000  | 7.802530000  | -11.906652000 |
| 6            | -13.264806000 | 8.776223000  | -9.283006000  |
| 1            | -13.817545000 | 8.881169000  | -10.226923000 |
| 1            | -13.952775000 | 8.285702000  | -8.574539000  |
| 1            | -13.013233000 | 9.767299000  | -8.888872000  |
| 6            | -4.373022000  | 2.953773000  | -9.714475000  |
| 1            | -4.100609000  | 3.458284000  | -8.772317000  |
| 1            | -4.226621000  | 1.880788000  | -9.559589000  |
| 1            | -3.647383000  | 3.276306000  | -10.480037000 |
| 6            | -8.388233000  | 7.867026000  | -8.628435000  |
| 1            | -7.749966000  | 6.992392000  | -8.471155000  |
| 1            | -7.867993000  | 8.566432000  | -9.300100000  |
| 1            | -8.517944000  | 8.389683000  | -7.671909000  |
| 8            | -8.253216000  | 4.649405000  | -8.411711000  |
| 1            | -7.845069000  | 3.859472000  | -8.012602000  |
| 1            | -9.092666000  | 4.785064000  | -7.935854000  |
| Compound (3) |               |              |               |
| 26           | 0.000000000   | 0.000000000  | 0.000000000   |
| 16           | 4.836228000   | -0.397656000 | 0.021791000   |
| 7            | -0.001403000  | 0.005854000  | 2.239862000   |
| 7            | 0.556115000   | -2.084919000 | 0.847921000   |
| 7            | 0.937927000   | -3.051016000 | -0.036832000  |
| 1            | 1.474862000   | -3.876627000 | 0.224300000   |
| 7            | -0.138247000  | -1.806899000 | -1.694192000  |
| 7            | 0.792545000   | -3.988124000 | -2.090686000  |
| 7            | 2.089813000   | 0.086307000  | -0.114680000  |
| 6            | 0.444897000   | -1.065572000 | 2.921217000   |
| 6            | 0.459536000   | -1.087469000 | 4.314477000   |

|    |              |              |              |
|----|--------------|--------------|--------------|
| 1  | 0.801586000  | -1.966026000 | 4.857962000  |
| 6  | -0.003132000 | 0.013070000  | 5.000804000  |
| 1  | -0.004274000 | 0.015700000  | 6.091873000  |
| 6  | 0.869952000  | -2.201533000 | 2.096613000  |
| 6  | 1.666381000  | -3.325301000 | 2.694568000  |
| 1  | 1.161267000  | -4.297911000 | 2.570983000  |
| 1  | 1.862483000  | -3.172824000 | 3.757343000  |
| 1  | 2.647520000  | -3.397722000 | 2.194343000  |
| 6  | 0.502337000  | -2.931891000 | -1.337879000 |
| 6  | 0.352652000  | -3.932790000 | -3.360535000 |
| 6  | 0.735106000  | -5.068758000 | -4.257706000 |
| 1  | 0.470246000  | -6.029357000 | -3.793733000 |
| 1  | 1.825686000  | -5.076942000 | -4.403468000 |
| 1  | 0.250044000  | -4.994760000 | -5.238571000 |
| 6  | -0.411105000 | -2.873330000 | -3.804250000 |
| 1  | -0.814231000 | -2.855856000 | -4.816652000 |
| 6  | -0.640897000 | -1.819881000 | -2.947151000 |
| 6  | -1.490448000 | -0.667399000 | -3.394154000 |
| 1  | -2.534368000 | -1.007028000 | -3.484055000 |
| 1  | -1.182199000 | -0.306111000 | -4.384517000 |
| 1  | -1.476510000 | 0.145096000  | -2.665297000 |
| 6  | 3.231663000  | -0.124869000 | -0.066300000 |
| 7  | -0.557855000 | 2.088975000  | 0.836315000  |
| 7  | -0.938555000 | 3.050432000  | -0.053953000 |
| 1  | -1.475891000 | 3.877285000  | 0.202227000  |
| 7  | 0.139691000  | 1.797673000  | -1.703440000 |
| 7  | -0.790597000 | 3.976794000  | -2.112494000 |
| 6  | -0.449236000 | 1.080479000  | 2.915048000  |
| 6  | -0.465620000 | 1.109659000  | 4.308156000  |
| 1  | -0.810946000 | 1.988720000  | 4.848321000  |
| 6  | -0.873254000 | 2.212113000  | 2.083987000  |
| 6  | -1.670428000 | 3.338988000  | 2.675060000  |
| 1  | -1.188736000 | 4.316981000  | 2.505489000  |
| 1  | -1.827131000 | 3.218237000  | 3.748133000  |
| 1  | -2.668188000 | 3.378894000  | 2.205153000  |
| 6  | -0.501335000 | 2.924510000  | -1.353814000 |
| 6  | -0.349116000 | 3.914824000  | -3.381485000 |
| 6  | -0.730440000 | 5.046085000  | -4.285059000 |
| 1  | -0.500304000 | 6.010379000  | -3.810802000 |
| 1  | -1.816379000 | 5.030451000  | -4.463761000 |
| 1  | -0.217570000 | 4.987122000  | -5.252893000 |
| 6  | 0.415194000  | 2.853062000  | -3.818699000 |
| 1  | 0.820208000  | 2.831655000  | -4.830298000 |
| 6  | 0.643910000  | 1.804106000  | -2.955818000 |
| 6  | 1.494015000  | 0.649307000  | -3.395727000 |
| 1  | 2.537072000  | 0.990750000  | -3.488345000 |
| 1  | 1.186075000  | 0.278222000  | -4.381795000 |
| 1  | 1.486571000  | -0.157306000 | -2.659891000 |
| 16 | -4.836936000 | 0.397402000  | 0.013656000  |
| 7  | -2.090353000 | -0.087259000 | -0.116843000 |
| 6  | -3.232261000 | 0.124164000  | -0.070998000 |

Compound (4)

|    |              |              |              |
|----|--------------|--------------|--------------|
| 28 | 0.000000000  | 0.000000000  | 0.000000000  |
| 16 | -4.481714000 | -1.374860000 | 0.676537000  |
| 7  | -0.629535000 | 0.973095000  | 1.816530000  |
| 7  | -0.234019000 | 0.574693000  | -2.088495000 |
| 7  | -2.816790000 | 2.692731000  | -3.421524000 |
| 7  | 0.555057000  | -1.319879000 | 1.464928000  |
| 7  | 0.787751000  | -1.530792000 | -1.039804000 |
| 7  | 0.261145000  | -0.974130000 | 2.741370000  |
| 1  | 0.454486000  | -1.559443000 | 3.553359000  |
| 7  | -0.662239000 | 0.554264000  | 4.177277000  |
| 7  | -2.737472000 | 0.297119000  | -3.217126000 |
| 7  | 1.754063000  | 1.022861000  | 0.065935000  |
| 7  | -1.916107000 | -0.667092000 | -0.073729000 |
| 7  | -0.944629000 | 1.662075000  | -2.613033000 |
| 16 | 4.177033000  | 2.398922000  | 0.153274000  |
| 1  | -0.774546000 | 2.525758000  | -2.102497000 |
| 6  | 0.211556000  | -0.271321000 | -2.954839000 |
| 6  | -2.218352000 | 1.527226000  | -3.094409000 |
| 6  | 1.467656000  | -2.499201000 | -3.085630000 |
| 1  | 1.530933000  | -2.468173000 | -4.172000000 |
| 6  | 1.296582000  | -2.555925000 | -0.332946000 |
| 6  | 1.109914000  | -2.438722000 | 1.139365000  |
| 6  | -0.367134000 | 0.244450000  | 2.918931000  |
| 6  | 2.009313000  | -3.555931000 | -2.377917000 |
| 1  | 2.501842000  | -4.366920000 | -2.916864000 |
| 6  | 0.121630000  | -0.113598000 | -4.433370000 |
| 1  | 0.025509000  | 0.947350000  | -4.694390000 |
| 1  | 1.010305000  | -0.526828000 | -4.927883000 |
| 1  | -0.768586000 | -0.634694000 | -4.818716000 |
| 6  | -1.671061000 | 2.520527000  | 3.282936000  |
| 1  | -2.218908000 | 3.450477000  | 3.429375000  |
| 6  | 0.856595000  | -1.476620000 | -2.371292000 |
| 6  | -1.330866000 | 1.708229000  | 4.366450000  |
| 6  | -4.060086000 | 2.607593000  | -3.914013000 |
| 6  | -4.004609000 | 0.240335000  | -3.651429000 |
| 6  | -1.300457000 | 2.113953000  | 2.011749000  |
| 6  | -1.613561000 | 2.920014000  | 0.777536000  |
| 1  | -2.237358000 | 2.318866000  | 0.100548000  |
| 1  | -2.141853000 | 3.848204000  | 1.024714000  |
| 1  | -0.673867000 | 3.168395000  | 0.261970000  |
| 6  | 1.478731000  | -3.520674000 | 2.091848000  |
| 1  | 0.592697000  | -3.867912000 | 2.648150000  |
| 1  | 1.906451000  | -4.389436000 | 1.582374000  |
| 1  | 2.221325000  | -3.171241000 | 2.828514000  |
| 6  | 2.768379000  | 1.583592000  | 0.076041000  |
| 6  | -1.717941000 | 2.057543000  | 5.761669000  |
| 1  | -0.844510000 | 2.004854000  | 6.427642000  |
| 1  | -2.157776000 | 3.060106000  | 5.823350000  |
| 1  | -2.450646000 | 1.328299000  | 6.140446000  |
| 6  | 1.910662000  | -3.618284000 | -0.999117000 |
| 1  | 2.326891000  | -4.463711000 | -0.453932000 |
| 6  | -4.657429000 | -1.117377000 | -3.692534000 |



|   |              |              |              |
|---|--------------|--------------|--------------|
| 1 | -4.823984000 | -1.465349000 | -2.660088000 |
| 1 | -5.619819000 | -1.086183000 | -4.217006000 |
| 1 | -3.996076000 | -1.849275000 | -4.176779000 |
| 6 | -4.700612000 | 1.383908000  | -4.031694000 |
| 1 | -5.722472000 | 1.316089000  | -4.403163000 |
| 6 | -4.740578000 | 3.884736000  | -4.313619000 |
| 1 | -4.108800000 | 4.451702000  | -5.012952000 |
| 1 | -5.712834000 | 3.690471000  | -4.781351000 |
| 1 | -4.894882000 | 4.525207000  | -3.432183000 |
| 6 | -2.971377000 | -0.943236000 | 0.227660000  |

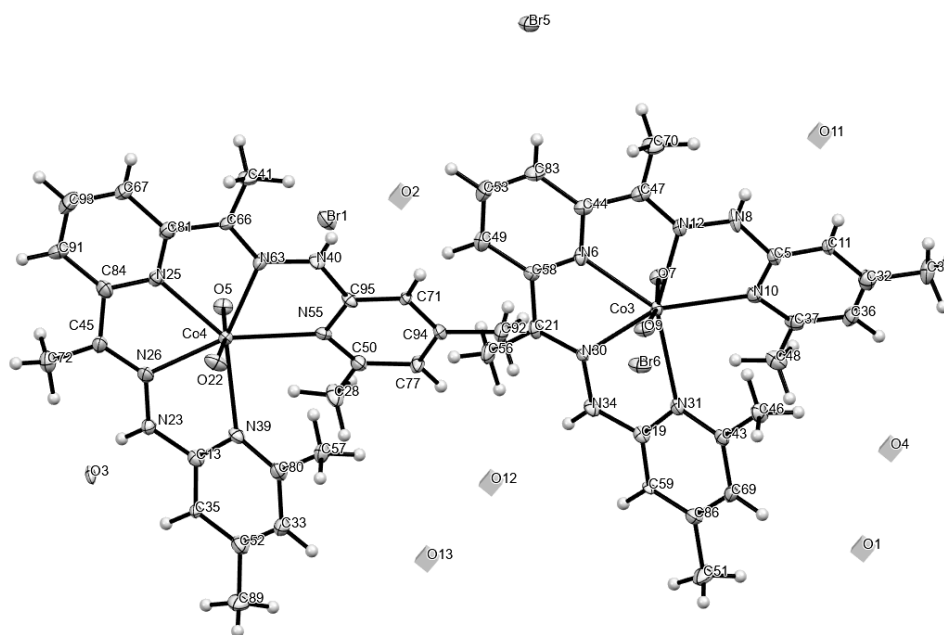

**Figure S1.** Molecular structure of the reaction product of **L** with Co(II) bromide in methanol. Composition of the coordinated unit is  $[\text{CoL}(\text{H}_2\text{O})_2]^{2+}$ , bromide anions are out-of-coordination sphere. The structure was not solved completely and is not published.

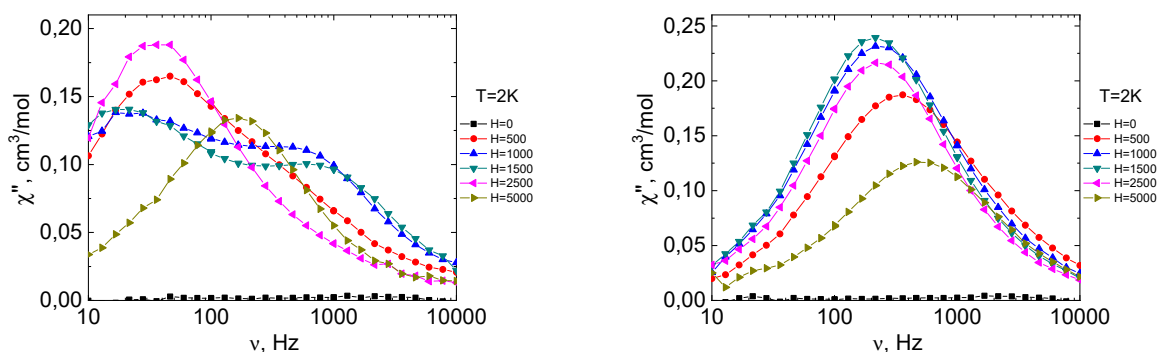

**Figure S2.** Frequency dependences of the out-of-phase  $\chi''$  AC susceptibility  $\chi_M$  for **1**(left) and **2**(right) at different applied magnetic fields  $H_{\text{DC}}$  and  $T = 2$  K.

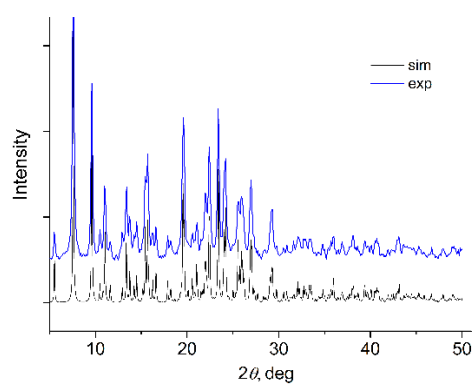

(a)

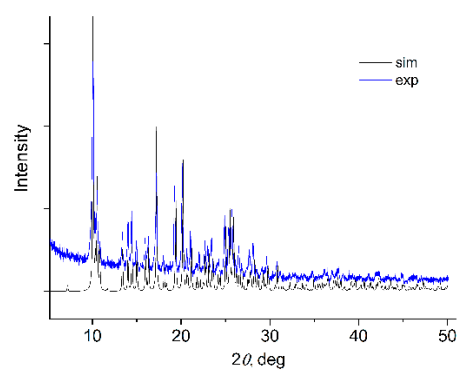

(b)

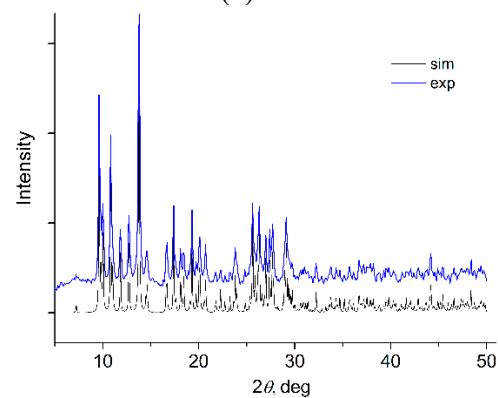

(c)

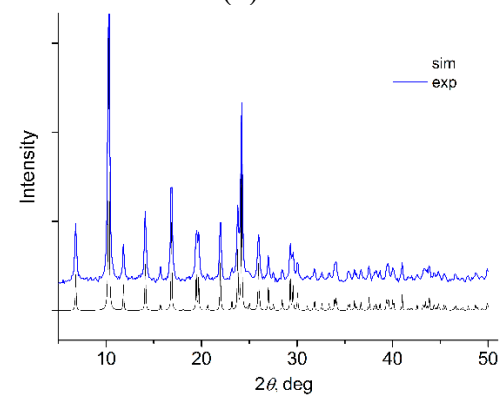

(d)

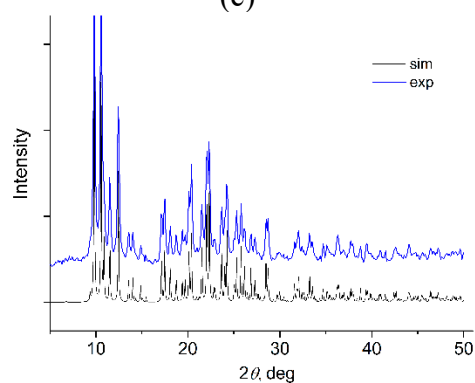

(e)

**Figure S3.** Powder X-ray diffraction pattern of polycrystalline samples of **1** (a), **2** (b) **2a** (c), **3** (d) and **4** (e): experimental (blue), and calculated from single crystal data (black).
